# Supplementary material
Source: PubMed Central journal article supplement (PMC8784026)

## Supplemental Material

Table S1. Patient-Level Characteristics.

|                                 |                                   | Intervention<br>(Letter +<br>Brochure) | Usual Care   | p-value<br>(Intervention<br>vs. Control) |
|---------------------------------|-----------------------------------|----------------------------------------|--------------|------------------------------------------|
| N of participants               |                                   | 1,440                                  | 1,544        | --                                       |
| Age, mean (sd)                  |                                   | 67.74 (7.48)                           | 68.04 (7.73) | 0.299                                    |
| Women, number (%)               |                                   | 1012 (74.6)                            | 1081 (74.4)  | 0.938                                    |
| Race / Ethnicity                | White, number (%)                 | 876 (64.6)                             | 926 (63.8)   | 0.622                                    |
|                                 | Black, number (%)                 | 436 (32.1)                             | 468 (32.2)   |                                          |
|                                 | Other, number (%)                 | 45 (3.3)                               | 58 (4)       |                                          |
| Education                       | Some high school, number (%)      | 42 (3.2)                               | 43 (3)       | 0.675                                    |
|                                 | Completed high school, number (%) | 326 (24.5)                             | 362 (25.4)   |                                          |
|                                 | Some college, number (%)          | 457 (34.3)                             | 514 (36)     |                                          |
|                                 | Completed college, number (%)     | 271 (20.3)                             | 281 (19.7)   |                                          |
|                                 | Graduate school, number (%)       | 237 (17.8)                             | 228 (16)     |                                          |
| Literacy, mean (sd)             |                                   | 4.35 (0.85)                            | 4.37 (0.87)  | 0.673                                    |
| Subjective Numeracy, mean (sd)  |                                   | 4.54 (0.10)                            | 4.52 (1.02)  | 0.535                                    |
| Comorbid<br>Conditions          | COPD, number (%)                  | 70 (5.2)                               | 76 (5.2)     | 0.928                                    |
|                                 | Depression, number (%)            | 248 (18.3)                             | 279 (19.2)   | 0.518                                    |
| Prior Fracture, number (%)      |                                   | 292 (21.6)                             | 311 (21.4)   | 0.916                                    |
| Prior DXA, number (%)           |                                   | 716 (52.8)                             | 774 (53.3)   | 0.805                                    |
| Smoking Status                  | Current, number (%)               | 83 (6.1)                               | 86 (5.9)     | 0.833                                    |
|                                 | Former, number (%)                | 564 (41.6)                             | 574 (39.7)   | 0.292                                    |
| Self- Reported<br>Health Status | Excellent, number (%)             | 155 (11.5)                             | 188 (13)     | 0.207                                    |
|                                 | Very Good, number (%)             | 490 (36.2)                             | 511 (35.3)   |                                          |
|                                 | Good, number (%)                  | 539 (39.8)                             | 535 (36.9)   |                                          |
|                                 | Fair, number (%)                  | 145 (10.7)                             | 183 (12.6)   |                                          |
|                                 | Poor, number (%)                  | 24 (1.8)                               | 32 (2.2)     |                                          |
| Study DXA<br>Results            | Normal, number (%)                | 452 (33.3)                             | 453 (31.2)   | 0.152                                    |
|                                 | Low BMD, number (%)               | 734 (54.1)                             | 782 (53.9)   |                                          |
|                                 | Osteoporosis, number (%)          | 171 (12.6)                             | 217 (14.9)   |                                          |
| Fracture Risk                   | Low, number (%)                   | 864 (63.7)                             | 885 (61)     | 0.208                                    |
|                                 | Medium, number (%)                | 372 (27.4)                             | 413 (28.4)   |                                          |
|                                 | High, number (%)                  | 121 (8.9)                              | 154 (10.6)   |                                          |

Figure S1. Analytic Sample.

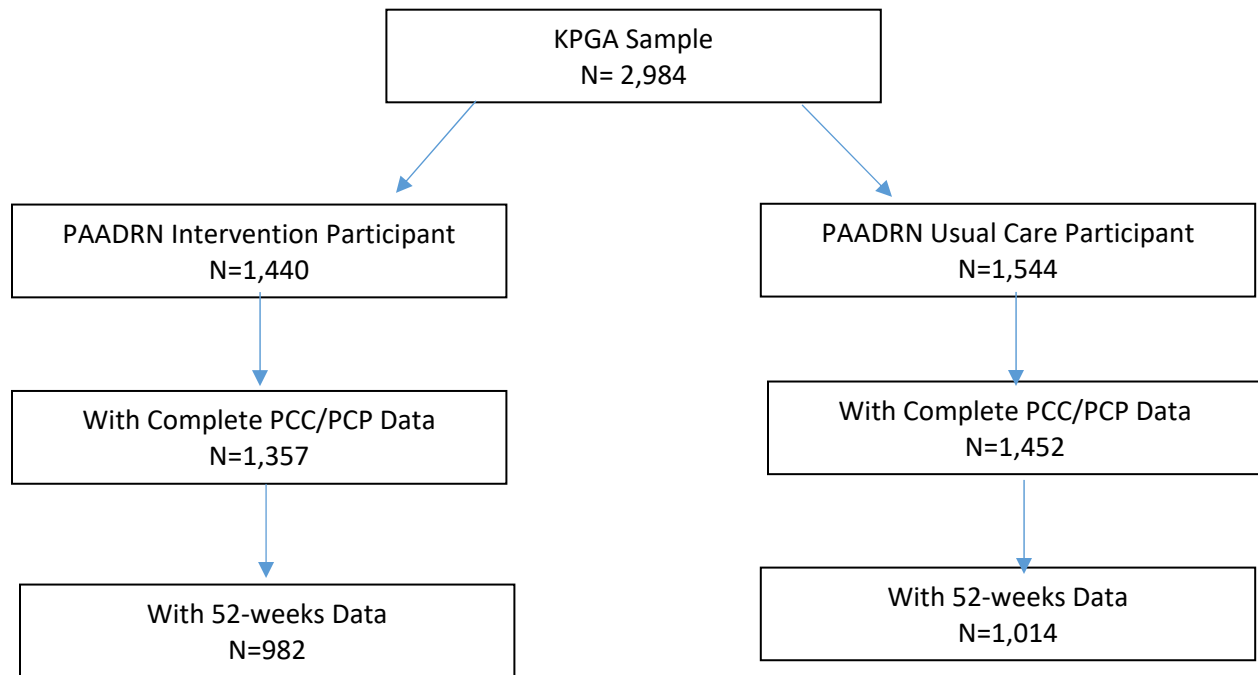

Supplement: tpj20095supp.pdf [file tpj20095supp.pdf]
